# Supplementary material for: The Role of IVC Filters in the Management of Acute Pulmonary Embolism
Source: MDPI journal article supplement (doi:10.3390/jcm13051494), 2024-03-05

**Supplementary Table S1.** IVC-filter-related complications and definitions.

| <b>IVC-Filter-Related Complications</b>          | <b>Definition</b>                                                                                                                                                                                                                                                                                                                                                                                                                                                                                                                     | <b>Reported Range of Frequency of Complications</b> |
|--------------------------------------------------|---------------------------------------------------------------------------------------------------------------------------------------------------------------------------------------------------------------------------------------------------------------------------------------------------------------------------------------------------------------------------------------------------------------------------------------------------------------------------------------------------------------------------------------|-----------------------------------------------------|
| IVC thrombotic occlusion                         | The detection of a thrombus obstructing the IVC following filter insertion can be confirmed through various diagnostic modalities, including ultrasound (US), computed tomography (CT), magnetic resonance (MR) imaging, venography, or autopsy.                                                                                                                                                                                                                                                                                      | 2% to 30%                                           |
| IVC penetration                                  | The penetration of the vein wall by a filter strut or anchor device is identified by transmural incorporation extending more than 3 mm beyond the wall of the IVC. This penetration can be demonstrated through imaging techniques such as CT or venography, or it can be observed at autopsy.                                                                                                                                                                                                                                        | Up to 41%                                           |
| Filter embolization                              | Post-deployment movement of the filter or its components refers to the displacement of the filter or its parts to a distant anatomic site, completely out of the intended target zone.                                                                                                                                                                                                                                                                                                                                                | Up to 11%                                           |
| Filter movement                                  | A change in the position of the filter, either cranial or caudal, is considered significant if it exceeds 2 cm from its originally deployed position. This change in position can be documented through various imaging methods such as plain radiography, CT, or venography.                                                                                                                                                                                                                                                         | Up to 18%                                           |
| Filter fracture                                  | Any compromise in the structural integrity of a filter, such as breakage or separation, can be documented through imaging studies or observation during autopsy.                                                                                                                                                                                                                                                                                                                                                                      | 2% to 10%                                           |
| Insertion problems                               | Malfunctions of the filter or deployment system encompass various issues, including incomplete filter opening, filter tilt exceeding 15° from the IVC axis (e.g., non-self-centering filters), misplacement of the filter outside the infrarenal IVC when the intended placement is within the infrarenal IVC (e.g., when a portion of the filter is within one iliac vein), or prolapse of filter components. When filter malposition necessitates surgical or endovascular removal, it is categorized as an insertion complication. | 5% to 23%                                           |
| Access site thrombosis                           | The development of either occlusive or non-occlusive thrombus at the venotomy site subsequent to filter insertion can be verified through US or other imaging modalities.                                                                                                                                                                                                                                                                                                                                                             | 3% to 10%                                           |
| Access site complications with clinical sequelae | Complications related to IVC filter insertion encompass various issues, such as arteriovenous fistula, hematoma, or bleeding that necessitates a transfusion. These complications may result in hospitalization, either admission or an extended stay, and may require further medical treatment.                                                                                                                                                                                                                                     | Up to 25%                                           |

**Supplementary Figure S1.** Radiographic images of IVC-filter-related complications

1) Struts Outside of IVC

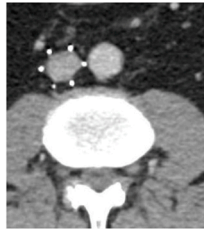

2) Filter Fracture

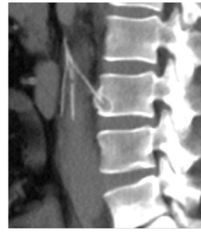

3) IVC Penetration

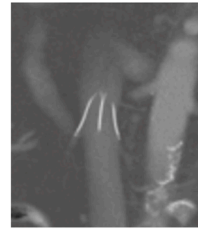

4) Filter Embolization

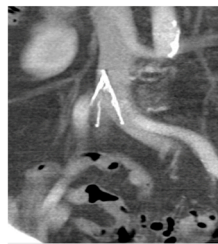

5) Filter Tilting

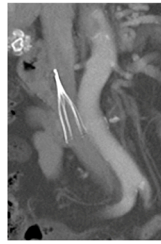

6) Strut Abutting Aorta

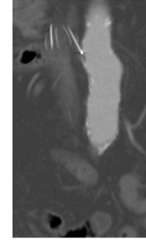

Supplement: s1 [file s1]
